# Supplementary material
Source: Springer Nature journal article supplement (https://www.springermedizin.de/resource/supplementary/13058_2010_2622_MOESM9_ESM.pdf/9702168)
Supplement: MOESM9 [file 9702168]

**Table 2.**

**A)**

|    |     | Overall Survival |         |       |                    |     | Disease Free Survival |         |       |                    |  |
|----|-----|------------------|---------|-------|--------------------|-----|-----------------------|---------|-------|--------------------|--|
| ID | Run | Predictor        | $\beta$ | p     | RR(95% CI)         | Run | Predictor             | $\beta$ | p     | RR(95% CI)         |  |
| a  | 1   | Tumour Grade 3   | 2.12    | 0.005 | 8.33 (1.90 -36.47) | 1   | PR                    | -0.99   | 0.021 | 0.37 (0.16 -0.86)  |  |
| b  | 2   | PR               | -1.36   | 0.011 | 0.26 (0.09 -0.74)  | 1   | p53m                  | 1.06    | 0.012 | 2.87 (1.27 -6.51)  |  |
| c  | 2   | p53m             | 1.10    | 0.026 | 3.00 (1.14 -7.85)  | 2   | Tumour Grade 3        | 1.51    | 0.003 | 4.52 (1.69 -12.11) |  |
| d  | 3   | ER               | -1.54   | 0.002 | 0.21 (0.08 -0.55)  | 3   | HER2                  | 1.16    | 0.012 | 3.18 (1.29 -7.83)  |  |
| e  | 4   | HER2             | 1.21    | 0.026 | 3.35 (1.16 -9.65)  | 4   | ER                    | -1.05   | 0.012 | 0.35 (0.16 -0.79)  |  |
| f  | 5*  | Lymph Nodes      | 1.19    | 0.037 | 3.30 (1.08 -10.13) | 5*  | Lymph Nodes           | 0.93    | 0.039 | 2.53 (1.05 -6.09)  |  |
| g  | 6*  | p53 $\beta$      | -0.38   | 0.491 | 0.69 (0.24 -2.00)  | 6*  | p53 $\beta$           | -0.17   | 0.699 | 0.84 (0.35 -2.03)  |  |
| h  | 6*  | p53 $\gamma$     | 0.48    | 0.337 | 1.61 (0.61 -4.29)  | 6*  | p53 $\gamma$          | 0.19    | 0.652 | 1.21 (0.52 -2.81)  |  |

**B)**

|   |    |                                       |      |       |                      |    |                                       |      |       |                    |
|---|----|---------------------------------------|------|-------|----------------------|----|---------------------------------------|------|-------|--------------------|
| i | 5* | p53m & p53 $\beta$ +                  | 0.07 | 0.451 | 1.47 (0.54 -3.99)    | 5* | p53m & p53 $\beta$ +                  | 0.97 | 0.053 | 2.65 (0.99 -7.10)  |
| j | 5* | p53m & p53 $\gamma$ +                 | 0.31 | 0.626 | 1.36 (0.39 -4.75)    | 5* | p53m & p53 $\gamma$ +                 | 0.49 | 0.333 | 1.63 (0.61 -4.36)  |
| k | 2  | p53m & p53 $\beta$ + & p53 $\gamma$ - | 2.87 | 0.017 | 17.56 (1.66 -186.15) | 4  | p53m & p53 $\beta$ + & p53 $\gamma$ - | 1.71 | 0.021 | 5.51 (1.29 -23.57) |
| l | 5* | p53m & p53 $\gamma$ + & p53 $\beta$ - | 0.78 | 0.298 | 2.19 (0.50 -9.59)    | 5* | p53m & p53 $\gamma$ + & p53 $\beta$ - | 0.31 | 0.679 | 1.36 (0.32 -5.78)  |
